# Supplementary material for: Single-molecule fingerprinting of protein-drug interaction using a funneled biological nanopore
Source: PubMed Central journal article supplement (PMC10073129; doi:10.1038/s41467-023-37098-4), 2023-04-04
Supplement: 41467_2023_37098_MOESM1_ESM.pdf [file 41467_2023_37098_MOESM1_ESM.pdf]

## Supplementary Information

### Single-molecule fingerprinting of protein-drug interaction using a funneled biological nanopore

Ki-Baek Jeong<sup>1,2,†</sup>, Minju Ryu<sup>1,3,†</sup>, Jin-Sik Kim<sup>1,2,†</sup>, Minsoo Kim<sup>4</sup>, Jejoong Yoo<sup>4</sup>, Minji Chung<sup>1</sup>, Sohee Oh<sup>1</sup>, Gyunghye Jo<sup>5</sup>, Seong-Gyu Lee<sup>5</sup>, Ho Min Kim<sup>5,6</sup>, Mi-Kyung Lee<sup>1,2,3,\*</sup>, Seung-Wook Chi<sup>1,3,7,\*</sup>

<sup>1</sup>Disease Target Structure Research Center, Division of Biomedical Research, Korea Research Institute of Bioscience and Biotechnology (KRIBB), Daejeon 34141, Republic of Korea

<sup>2</sup>Critical Diseases Diagnostics Convergence Research Center, KRIBB, Daejeon 34141, Republic of Korea

<sup>3</sup>Department of Proteome Structural Biology, KRIBB School of Bioscience, University of Science and Technology, Daejeon 34113, Republic of Korea

<sup>4</sup>Department of Physics, Sungkyunkwan University, Suwon, Gyeonggi 16419, Republic of Korea

<sup>5</sup>Center for Biomolecular and Cellular Structure, Institute for Basic Science (IBS), Daejeon 34126, Republic of Korea

<sup>6</sup>Graduate School of Medical Science and Engineering, Korea Advanced Institute of Science and Technology (KAIST), Daejeon 34141, Republic of Korea

<sup>7</sup>School of Pharmacy, Sungkyunkwan University, Suwon, Gyeonggi 16419, Republic of Korea

Corresponding authors: miki@kribb.re.kr, swchi@kribb.re.kr

† These authors contributed equally.

## Contents

|                                                                                                                                                                               |    |
|-------------------------------------------------------------------------------------------------------------------------------------------------------------------------------|----|
| Supplementary Fig. 1. Purification of YaxAB pores. ....                                                                                                                       | 4  |
| Supplementary Fig. 2. Negative-staining electron microscopy (EM) image of YaxAB pore and the structure of YaxAB-C <sub>8</sub> . ....                                         | 5  |
| Supplementary Fig. 3. Open conductance distributions of YaxAB nanopores.....                                                                                                  | 6  |
| Supplementary Fig. 4. Electrophysiological characterization of YaxAB nanopores.....                                                                                           | 7  |
| Supplementary Fig. 5. The circular dichroism (CD) analysis of protein analytes.....                                                                                           | 8  |
| Supplementary Fig. 6. Measurement of dwell times of Bcl-xL using YaxAB nanopores at different voltages. ....                                                                  | 9  |
| Supplementary Fig. 7. Current blockade analysis for Bcl-xL using YaxAB nanopores at different voltages.....                                                                   | 10 |
| Supplementary Fig. 8. The capture rate and trapping event frequency of wild-type and mutant Bcl-xL measured using YaxAB nanopores at different voltages.....                  | 11 |
| Supplementary Fig. 9. The Brownian dynamics simulation used to model Bcl-xL movement within a YaxAB nanopore.....                                                             | 12 |
| Supplementary Fig. 10. Distinctive current signal patterns of Bcl-xL and its mutants measured by YaxAB nanopores at different voltages.....                                   | 13 |
| Supplementary Fig. 11. Current blockade analysis of Bcl-xL/Bak-BH3 complex using YaxAB nanopores at different voltages.....                                                   | 14 |
| Supplementary Fig. 12. Current blockade-based analysis of Bcl-xL/Bak-BH3 interaction inhibition by ABT-737 using YaxAB nanopores.....                                         | 15 |
| Supplementary Fig. 13. Orientation and strength of dipole moment for free Bcl-xL and three Bcl-xL complexes (Bcl-xL/Bak-BH3, Bcl-xL/ABT-737, and Bcl-xL/A-1331852).....       | 16 |
| Supplementary Fig. 14. Current noise ( $I_N$ )-based analysis of nanopore events upon titration of Bcl-xL with Bak-BH3.....                                                   | 17 |
| Supplementary Fig. 15. Current noise ( $I_N$ )-based analysis of nanopore events upon titration of Bcl-xL with ABT-737.....                                                   | 18 |
| Supplementary Fig. 16. Current noise ( $I_N$ )-based analysis of nanopore events upon titration of Bcl-xL with A-1331852.....                                                 | 19 |
| Supplementary Fig. 17. Current noise ( $I_N$ ) analysis-based determination of Bcl-xL binding affinity for Bak-BH3 peptide, ABT-737, and A-1331852 using YaxAB nanopores..... | 20 |
| Supplementary Fig. 18. SPR analysis for interaction between Bcl-xL and small-molecule drugs.....                                                                              | 21 |
| Supplementary Fig. 19. YaxAB nanopore measurements with non-specific small-molecule ligands.....                                                                              | 22 |

|                                                                                                                        |    |
|------------------------------------------------------------------------------------------------------------------------|----|
| Supplementary Fig. 20. Detection of FKBP12/FK506 interaction using YaxAB nanopores.....                                | 23 |
| Supplementary Fig. 21. Detection of holo-transferrin/oxaliplatin interaction using YaxAB nanopores.....                | 24 |
| Supplementary Fig. 22. Current blockade and noise analyses of Bcl-xL/Quercetin interactions using YaxAB nanopores..... | 25 |
| Supplementary Fig. 23. Current blockade and noise analyses of Bcl-xL/Bax-BH3 interactions using YaxAB nanopores.....   | 26 |
| Supplementary Fig. 24. YaxAB nanopore measurements in the presence of DMSO.....                                        | 27 |
| Supplementary Table 1. Current-voltage (I-V) curves for YaxAB nanopores in symmetric salt conditions at pH 7.5.....    | 28 |
| Supplementary Table 2. Current-voltage (I-V) curves for YaxAB nanopores in asymmetric salt conditions at pH 7.5.....   | 29 |
| Supplementary Table 3. Ion selectivity of YaxAB nanopores.....                                                         | 30 |
| Supplementary Table 4. Molecular properties of Bcl-xL and its complexes.....                                           | 31 |

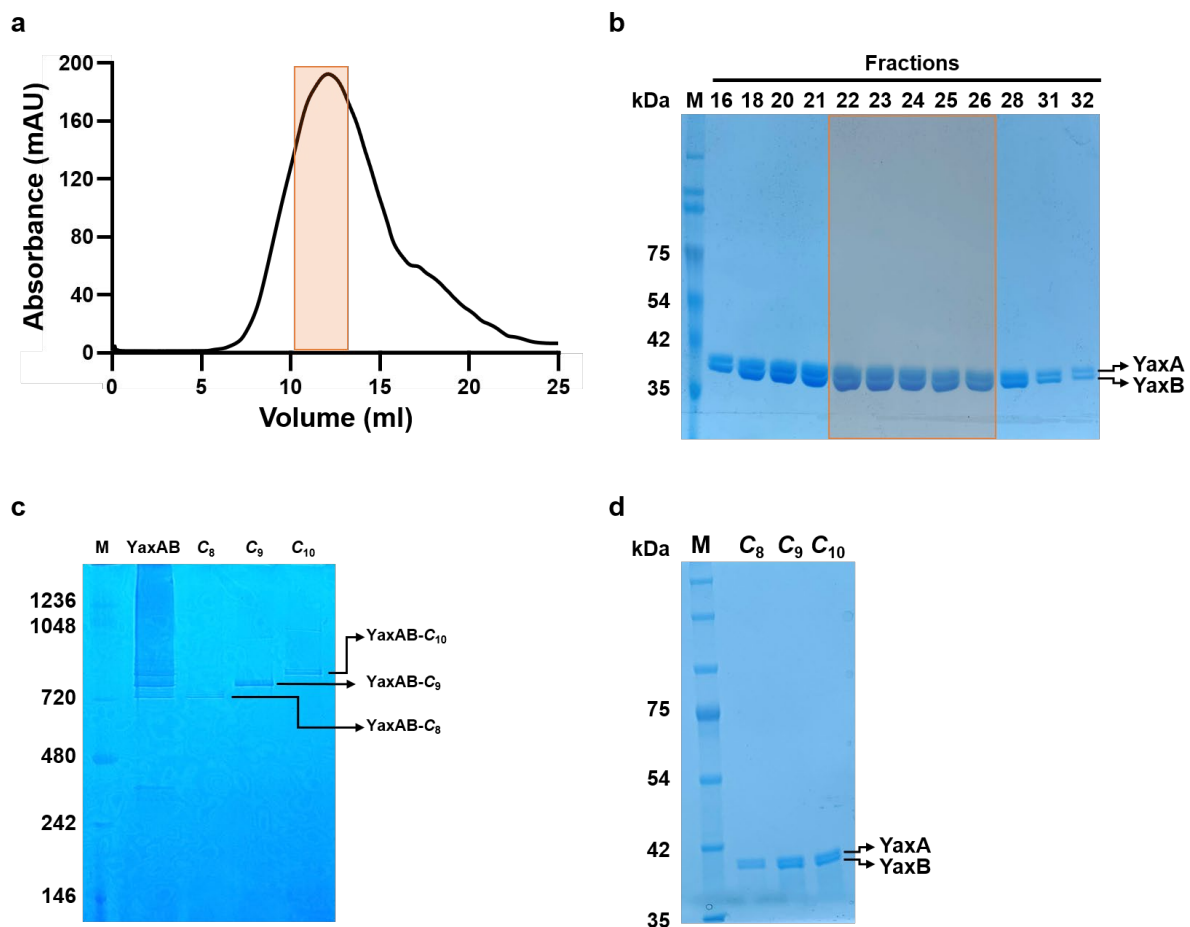

**Supplementary Fig. 1: Purification of YaxAB pores. a-d.** The chromatogram of size exclusion chromatography using the Superose 6 column (a) and SDS-PAGE gel image of purified YaxAB complex (b). (c) The native gel image of three YaxAB oligomeric states, YaxAB- $C_8$  (16-mer), YaxAB- $C_9$  (18-mer), and YaxAB- $C_{10}$  (20-mer), separated via gel extraction. (d) The SDS-PAGE gel image of the three YaxAB oligomeric states (YaxAB- $C_8$ , YaxAB- $C_9$ , and YaxAB- $C_{10}$ ) extracted from gel. All gel images include a size marker (lane M). The representative PAGE result is shown ( $n = 3$  independent replicates). Source data are provided as a Source Data file.



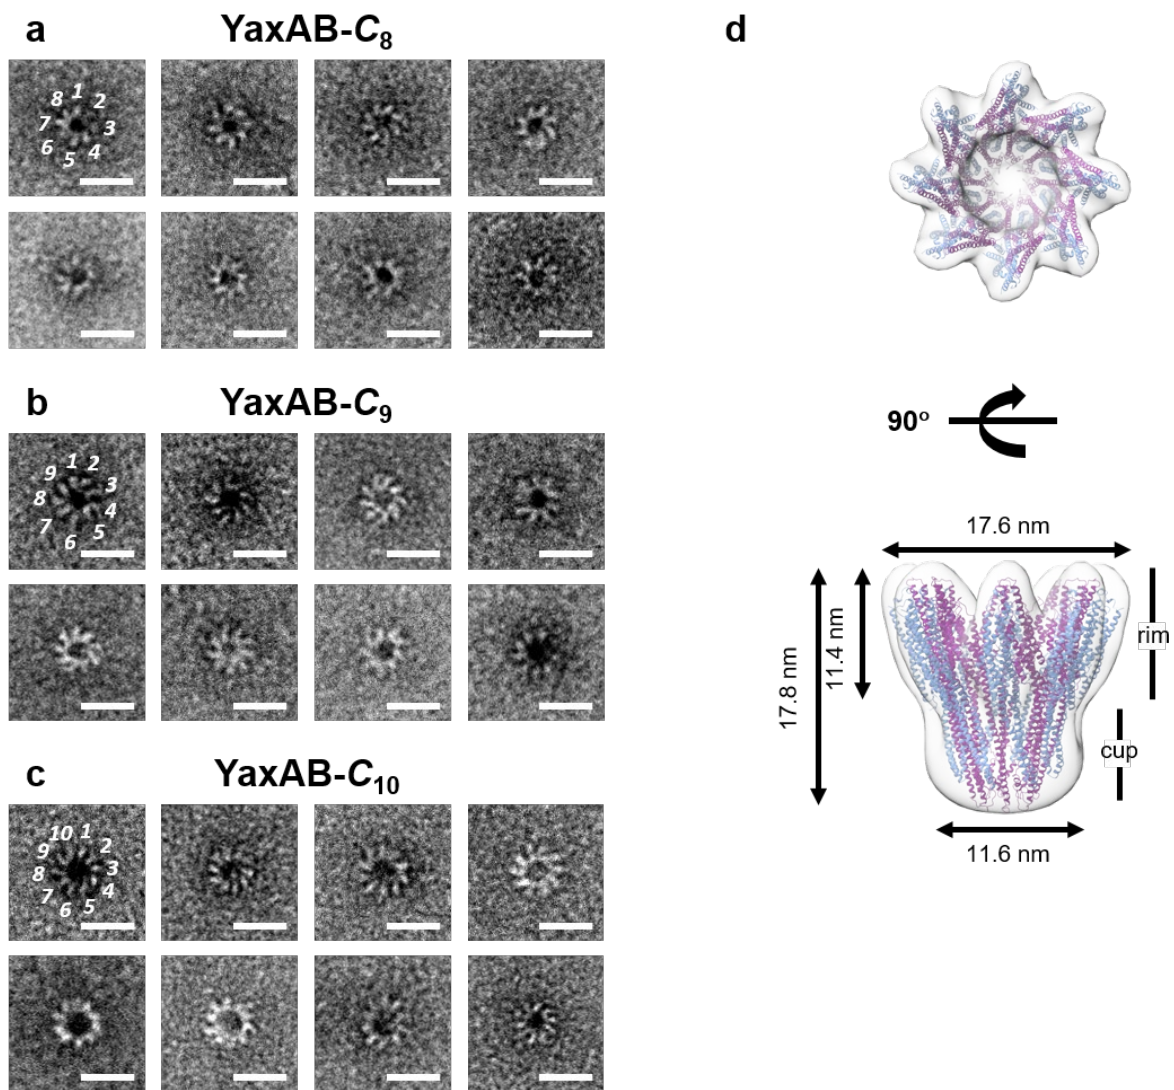

**Supplementary Fig. 2: Negative-staining electron microscopy (EM) image of YaxAB pore and the structure of YaxAB-C<sub>8</sub>.** **a-c.** Top view of YaxAB-C<sub>8</sub> (**a**), YaxAB-C<sub>9</sub> (**b**), and YaxAB-C<sub>10</sub> (**c**) pores cropped from raw micrographs of EM. The representative microscopy image is presented ( $n = 2$  independent replicates). Source data are provided as a Source Data file. **d.** 3D volume and structural model of YaxAB-C<sub>8</sub> highlighting views along the C<sub>8</sub> symmetry axis and side views of the YaxAB-C<sub>8</sub> pore. YaxA and YaxB are colored blue and purple, respectively. Scale bar = 25 nm.

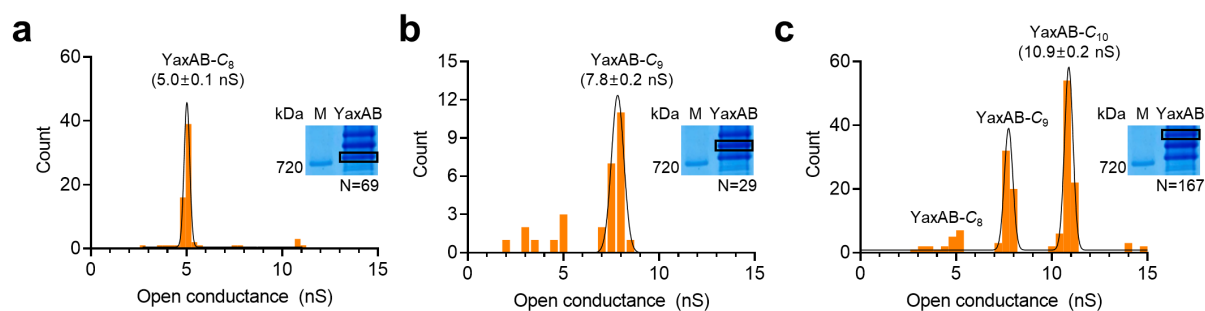

**Supplementary Fig. 3: Open conductance distributions of YaxAB nanopores. a-c.** Three types of YaxAB pore protein were collected from three separate bands on the blue native gel (4-16 %). Each conductance histogram was derived from nanopore experiments using YaxAB-C<sub>8</sub> (a), YaxAB-C<sub>9</sub> (b), or YaxAB-C<sub>10</sub> (c) (black box). Conductance of each pore was recorded at 100 mV (*cis* side) in 1 M KCl at pH 7.5. In total, 265 nanopores were tested for pore insertion. All gel images include a size marker (lane M).

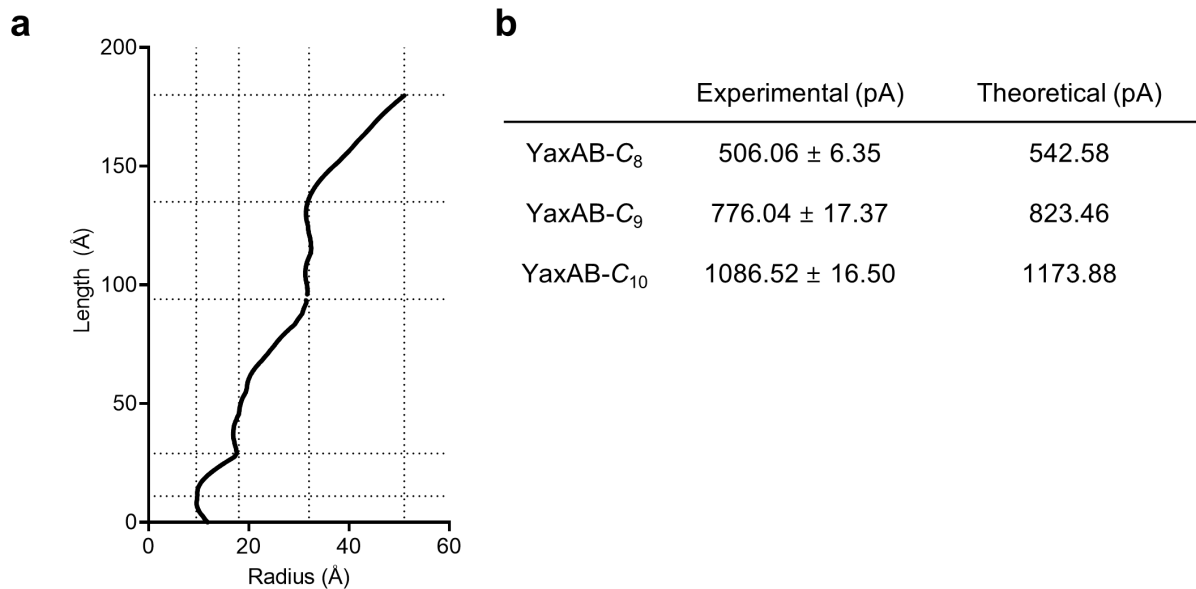

**Supplementary Fig. 4: Electrophysiological characterization of YaxAB nanopores. a.** Radius and length of the YaxAB-C<sub>8</sub> nanopore were estimated using the program HOLE. **b.** Comparison between experimental and theoretical ionic currents of each pore. At an applied voltage of 100 mV, experimental and theoretical ionic currents were well-matched. The theoretical ionic currents were calculated from the inverse of the total resistance ( $R_{\text{pore}}$ ) for funnel geometry of each pore, derived from YaxAB models (Equation 3, Methods section).

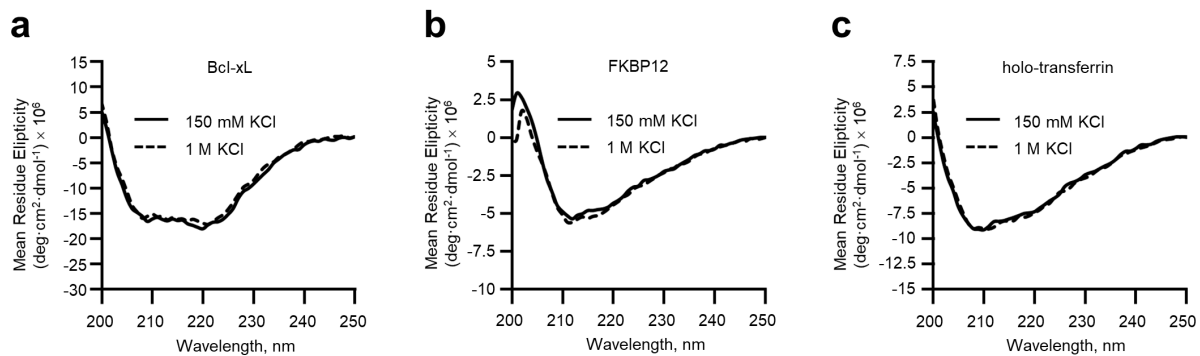

**Supplementary Fig. 5. The circular dichroism (CD) analysis of protein analytes. a-c.** The CD spectra of Bcl-xL (a), FKBP12 (b), and holo-transferrin (c) in the nanopore measurement buffer containing 150 mM and 1 M KCl.

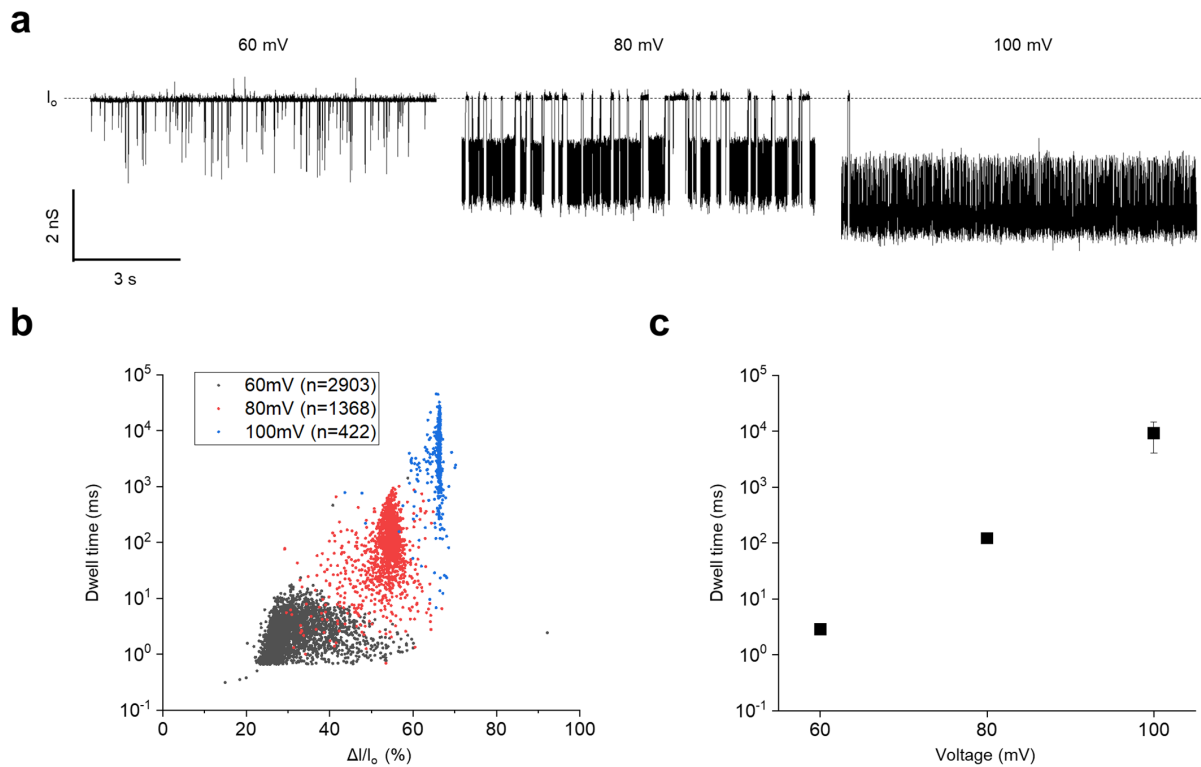

**Supplementary Fig. 6: Measurement of dwell times of Bcl-xL using YaxAB nanopores at different voltages.** **a.** Representative current traces of Bcl-xL at various applied voltages (60, 80, and 100 mV). **b.** The scatter plot of dwell time vs. relative current blockades ( $\Delta I/I_0$ ) of nanopore events obtained at 60 mV (black), 80 mV (red), and 100 mV (blue). **c.** The voltage-dependence on dwell times of nanopore events obtained from Bcl-xL. The mean values of dwell times at 60, 80 and 100 mV are  $2.85 \pm 0.30$  ms,  $120.93 \pm 12.45$  ms, and  $9292.96 \pm 5200.98$  ms, respectively. Data are presented as mean  $\pm$  SD,  $n = 3$  independent replicates for each engaged voltage. Source data are provided as a Source Data file.

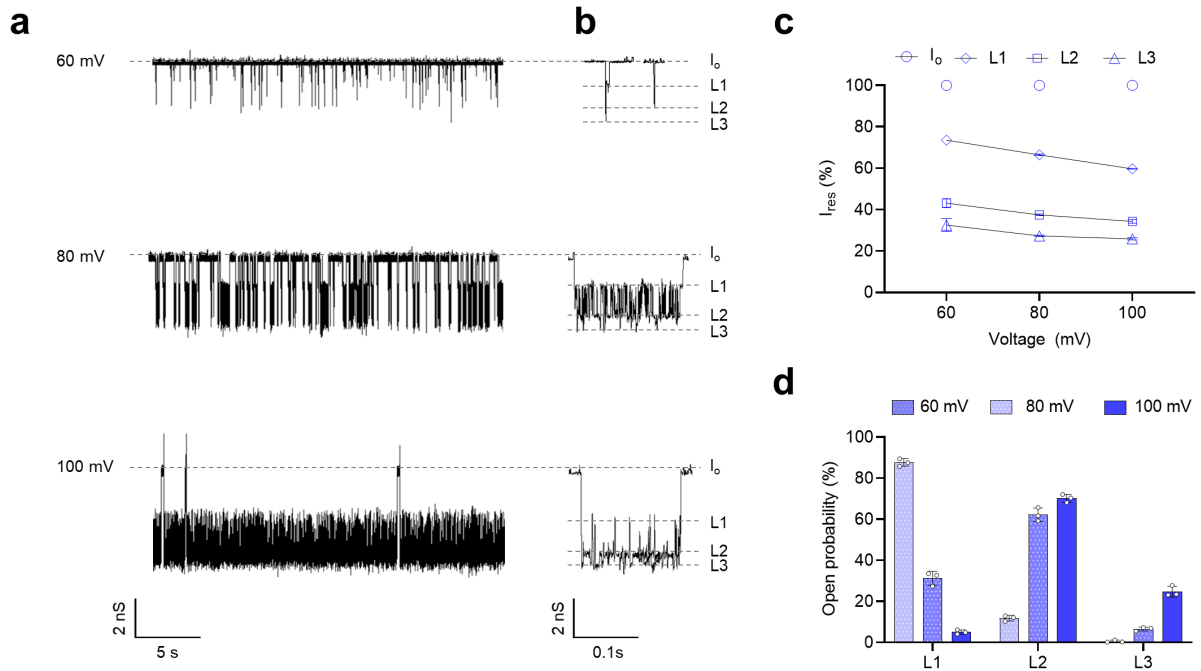

**Supplementary Fig. 7: Current blockade analysis of Bcl-xL using YaxAB nanopores at different voltages.** **a.** Representative current traces of Bcl-xL trapped by a YaxAB nanopore with engaged voltages (60, 80, and 100 mV) and a 1 kHz filter.  $I_o$  indicates open current of the nanopore, and each ionic current levels are L1, L2, and L3, respectively. Residual current ( $I_{res}$ ) gradually decreased with voltage increase until 100 mV. **b.** Representative nanopore events exhibiting vibration signals. **c.** Residual current of Bcl-xL trapped by YaxAB nanopore decreased with voltage increment (60 to 100 mV). Data are presented as mean  $\pm$  SD,  $n = 3$  independent replicates for voltages (60, 80, and 100 mV). The ratio of residual current of L1 to L3 levels at different voltage biases; L1 ( $73.54 \pm 1.08\%$ ), L2 ( $43.14 \pm 2.19\%$ ), and L3 ( $32.54 \pm 3.14\%$ ) at 60 mV; L1 ( $66.43 \pm 0.36\%$ ), L2 ( $37.44 \pm 0.42\%$ ), and L3 ( $27.33 \pm 0.28\%$ ) at 80 mV; L1 ( $59.72 \pm 0.17\%$ ), L2 ( $34.26 \pm 0.87\%$ ), and L3 ( $25.85 \pm 0.52\%$ ) at 100 mV. Source data are provided as a Source Data file. **d.** Open probability of each peak level in Bcl-xL as a function of engaged voltages. Data are presented as mean  $\pm$  SD,  $n = 3$  independent replicates for each engaged voltage. The open probability of L1 to L3 current levels at different voltage biases: L1 ( $87.62 \pm 1.82\%$ ), L2 ( $11.82 \pm 1.37\%$ ), and L3 ( $0.57 \pm 0.54\%$ ) at 60 mV; L1 ( $31.25 \pm 3.38\%$ ), L2 ( $62.18 \pm 3.29\%$ ), and L3 ( $6.58 \pm 0.92\%$ ) at 80 mV; L1 ( $5.04 \pm 1.05\%$ ), L2 ( $70.19 \pm 1.95\%$ ), and L3 ( $24.76 \pm 2.6\%$ ) at 100 mV. Source data are provided as a Source Data file.

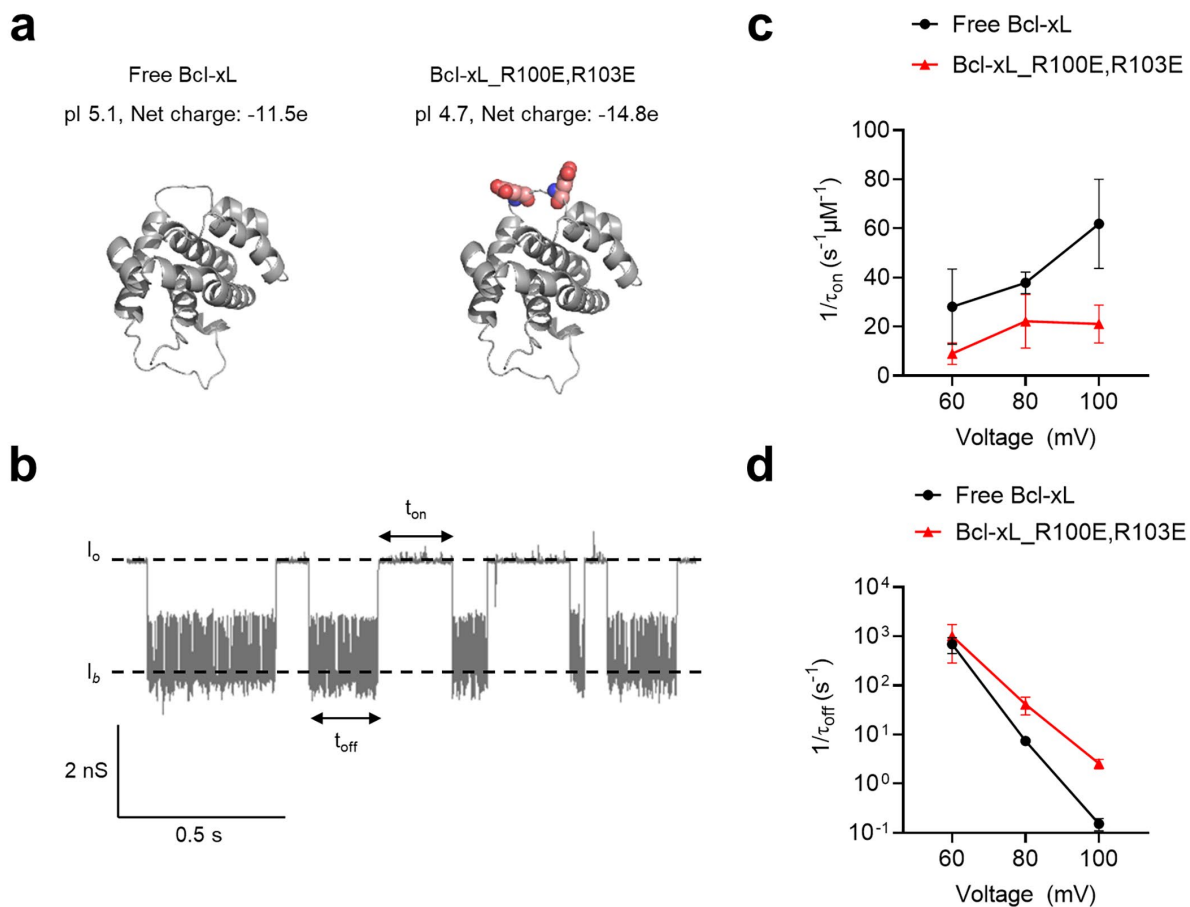

**Supplementary Fig. 8: The capture rate and trapping event frequency of wild-type and mutant Bcl-xL measured by YaxAB nanopores at different voltages.** **a.** Net-charge properties of wild-type and mutant Bcl-xL (Bcl-xL\_R100E,R103E). The mutation sites are indicated as spheres (red and blue) in Bcl-xL structure (gray). **b.** The representative current trace of wild-type Bcl-xL at 80 mV with the definition of event parameter. The interevent interval ( $t_{on}$ ) and the dwell time ( $t_{off}$ ) are defined as marked on the current trace. The mean time constants ( $\tau_{on}$  and  $\tau_{off}$ ) were derived by fitting exponential decay with histograms of  $t_{on}$  and  $t_{off}$  at the various applied voltage (60, 80, and 100 mV), respectively. **c.** Plots of capture rate ( $1/\tau_{on}$ ) vs. applied voltage of wild-type Bcl-xL (black circle) and mutant Bcl-xL (red triangle). Data are presented as mean  $\pm$  SD,  $n = 3$  independent replicates for wild-type Bcl-xL at 60 and 80 mV,  $n = 2$  independent replicates for wild-type at 100 mV. The value of  $1/\tau_{on}$ : free Bcl-xL,  $28.14 \pm 15.31$ ,  $37.85 \pm 4.38$ ,  $61.84 \pm 18.16$   $s^{-1}\mu M^{-1}$ ; the mutant Bcl-xL,  $9.01 \pm 4.40$ ,  $22.19 \pm 10.92$ ,  $21.10 \pm 7.70$   $s^{-1}\mu M^{-1}$  at different voltage biases (60, 80, and 100 mV). Source data are provided as a Source Data file. **d.** Plots of  $1/\tau_{off}$  vs. applied voltage. Data are presented as mean  $\pm$  SD,  $n = 3$  independent replicates. The value of  $1/\tau_{off}$ : free Bcl-xL,  $691.47 \pm 248.61$ ,  $7.38 \pm 0.85$ ,  $0.15 \pm 0.04$   $s^{-1}$ ; the mutant Bcl-xL,  $1013.97 \pm 729.04$ ,  $41.15 \pm 16.27$ ,  $2.57 \pm 0.56$   $s^{-1}$  at different voltage biases (60, 80, and 100 mV). Source data are provided as a Source Data file.

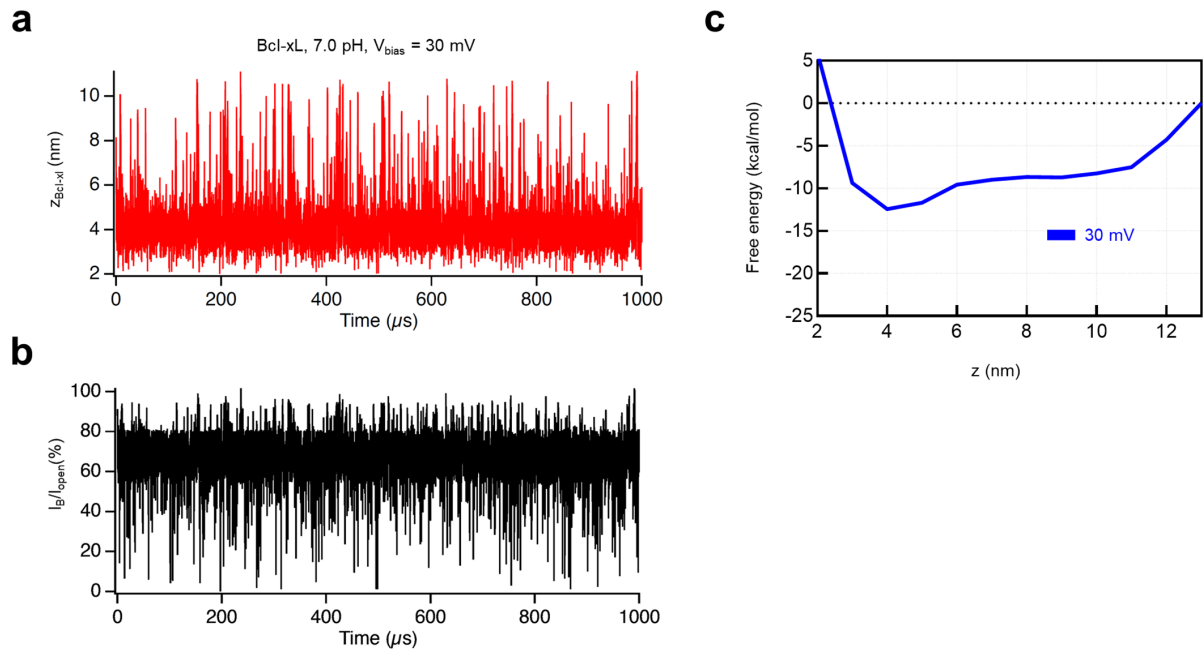

**Supplementary Fig. 9: The Brownian dynamics simulation used to model Bcl-xL movement within a YaxAB nanopore.** The position (a) and relative current blockade (b) of Bcl-xL were calculated by Brownian dynamics simulations performed at pH 7.0 at 30 mV. The condition was optimized to prove the presence of two levels of Bcl-xL in a YaxAB nanopore. (c) Free energy landscapes of Bcl-xL within a YaxAB nanopore at 30 mV.



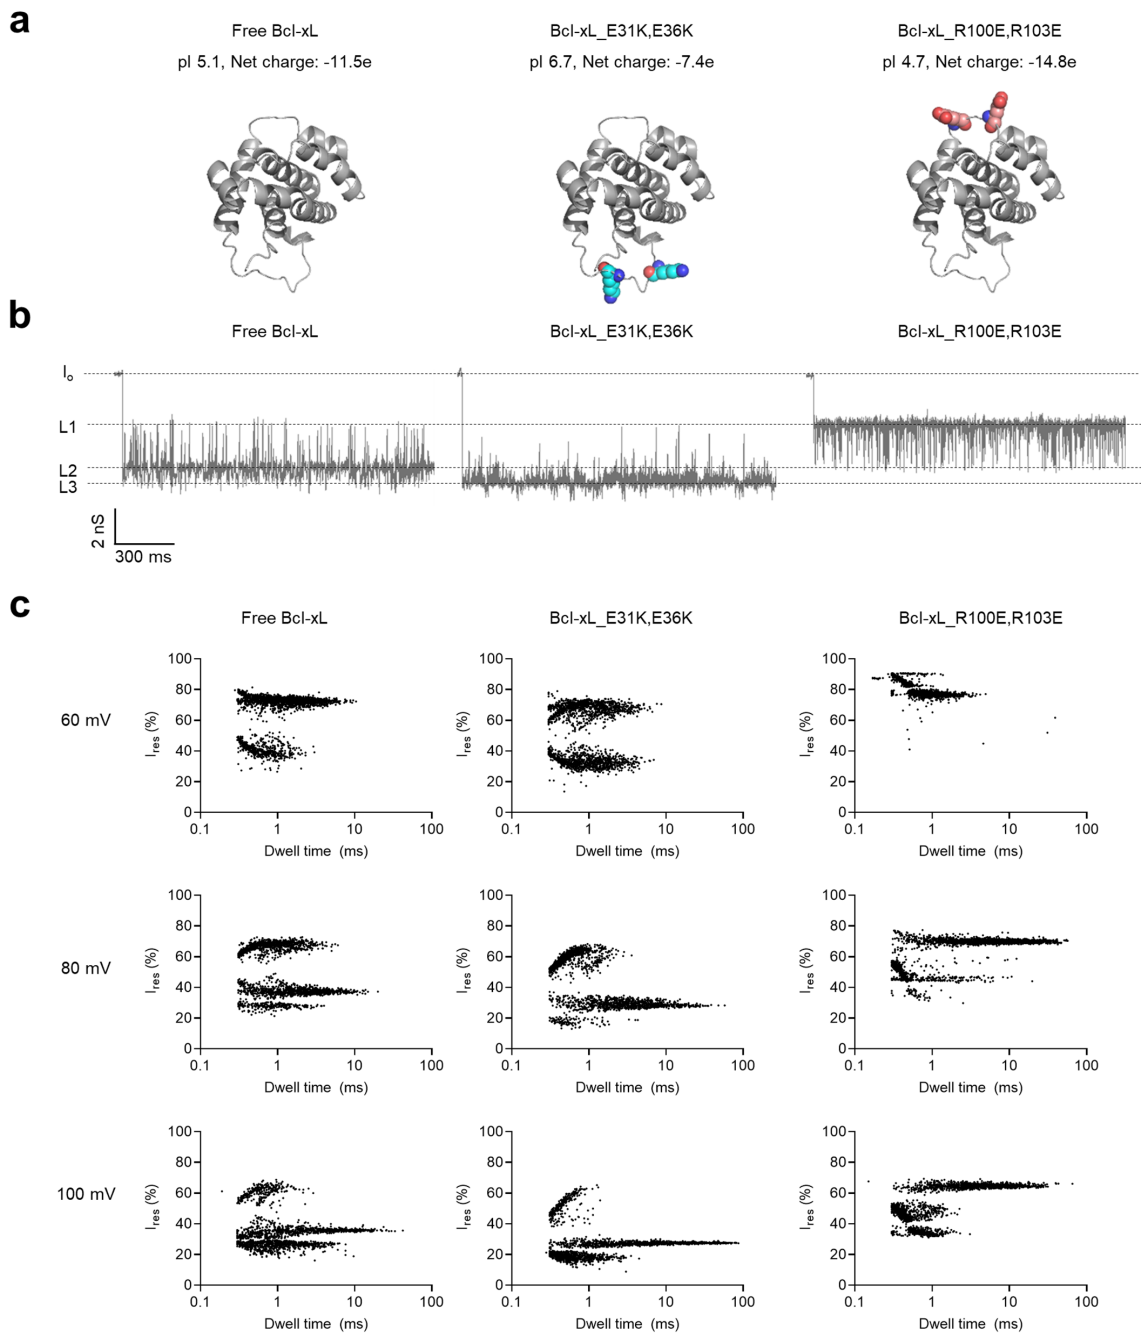

**Supplementary Fig. 10: Distinctive current signal patterns of Bcl-xL and its mutants measured by YaxAB nanopores at different voltages.** **a.** Bcl-xL and its variants (Bcl-xL\_E31K,E36K as a positively charged mutant and Bcl-xL\_R100E,R103E as a negatively charged mutant). The mutation sites are indicated as spheres (red and blue) in Bcl-xL structure (gray). **b.** Representative multi-level current blockades for each analyte measured at 100 mV. **c.** The scatter plot ( $I_{res}$  versus dwell time) for wild-type Bcl-xL and its variants at various voltages (60, 80, and 100 mV). All electrical current was filtered with a low-pass Bessel filter at 1 kHz with a sampling rate of 100 kHz. All of statistical analysis was performed over 2,000 events.

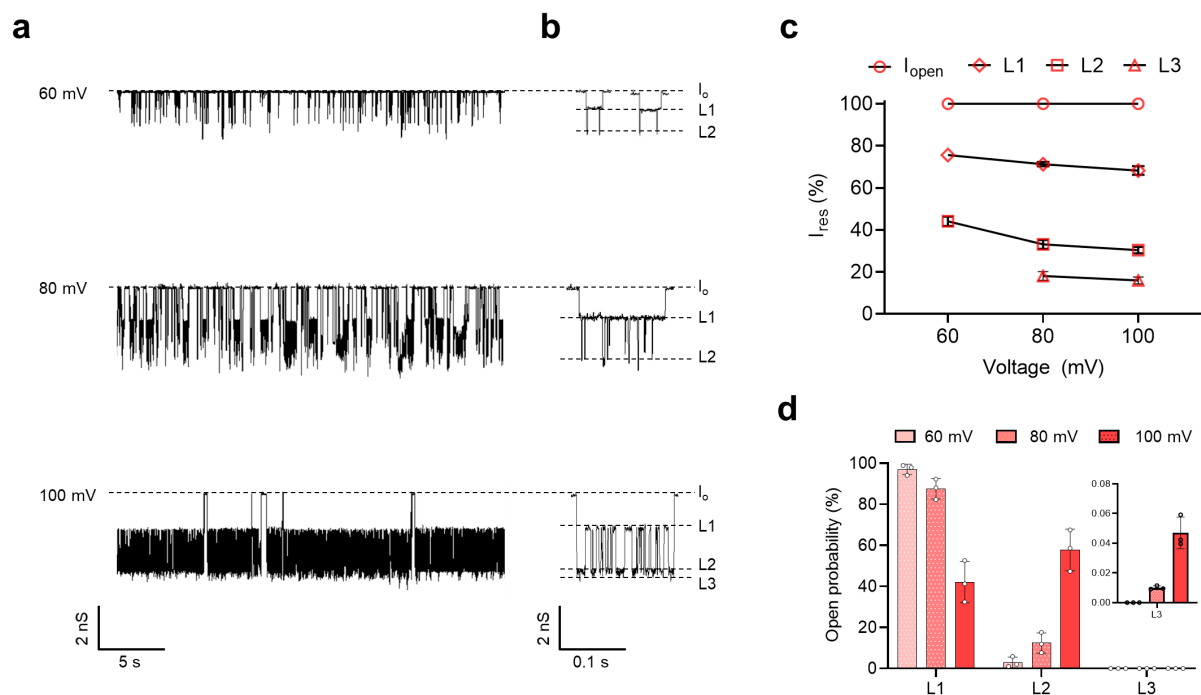

**Supplementary Fig. 11: Current blockades analysis of Bcl-xL/Bak-BH3 complex using YaxAB nanopores at different voltages.** **a.** Representative current traces of the Bcl-xL/Bak-BH3 complex trapped by a YaxAB nanopore with engaged voltages (60, 80, and 100 mV) and a 1 kHz filter.  $I_o$  indicates open current of the nanopore, and each ionic current levels are L1, L2, and L3, respectively. Residual current ( $I_{res}$ ) gradually decreased with voltage increase until 100 mV. **b.** Representative nanopore events exhibiting vibration signals. **c.** Residual current of Bcl-xL/Bak-BH3 trapped by the YaxAB nanopore decreased with voltage increment (60 to 100 mV). Data are presented as mean  $\pm$  SD,  $n = 3$  independent replicates at each engaged voltage. The ratio of residual current of L1 to L3 levels at different voltage biases; L1 ( $75.67 \pm 0.17\%$ ) and L2 ( $44.04 \pm 2.21\%$ ) at 60 mV; L1 ( $71.28 \pm 1.02\%$ ), L2 ( $33.10 \pm 2.06\%$ ), and L3 ( $18.06 \pm 2.11\%$ ) at 80 mV; L1 ( $68.24 \pm 2.06\%$ ), L2 ( $30.32 \pm 1.50\%$ ), and L3 ( $15.91 \pm 1.63\%$ ) at 100 mV. Source data are provided as a Source Data file. **d.** Open probability of each peak level in Bcl-xL/Bak-BH3 as a function of engaged voltages. Data are presented as mean  $\pm$  SD,  $n = 3$  independent replicates at each engaged voltage. The open probability of L1 to L3 current levels at different voltage biases: L1 ( $96.99 \pm 2.54\%$ ) and L2 ( $3.01 \pm 2.54\%$ ) at 60 mV; L1 ( $87.56 \pm 4.97\%$ ), L2 ( $12.43 \pm 4.97\%$ ), and L3 ( $0.01 \pm 0.001\%$ ) at 80 mV; L1 ( $42.36 \pm 10.09\%$ ), L2 ( $57.59 \pm 10.09\%$ ), and L3 ( $0.05 \pm 0.01\%$ ) at 100 mV. Magnified open probability of L3 at three different voltages (inset). Source data are provided as a Source Data file.

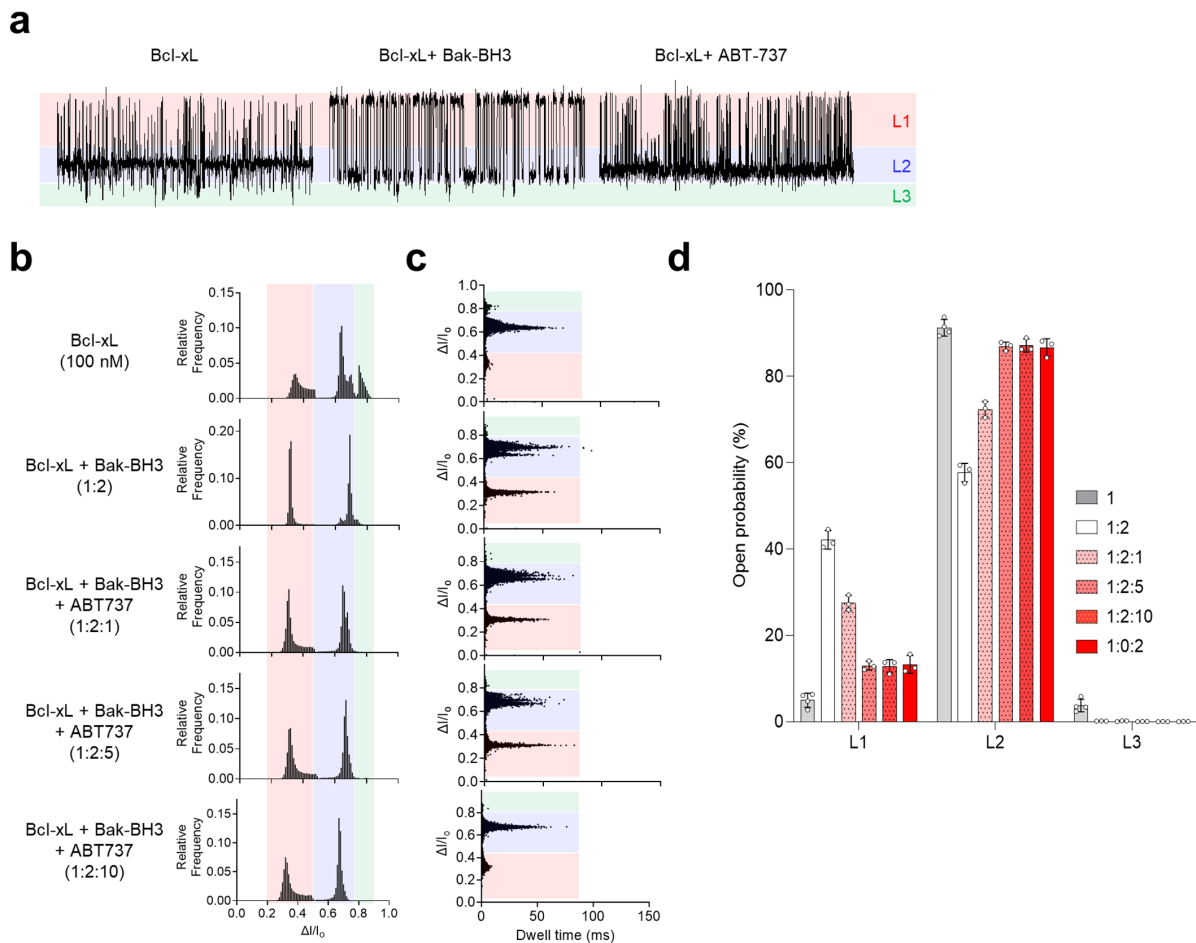

**Supplementary Fig. 12: Current blockade-based analysis of Bcl-xL/Bak-BH3 interaction inhibition by ABT-737 using YaxAB nanopores.** **a.** Representative current traces from Bcl-xL, Bcl-xL/Bak-BH3 complex (at the molar ratio of 1:2), and Bcl-xL/Bak-BH3 complex in the presence of ABT-737 (at the molar ratio of 1:2:10 Bcl-xL:Bak-BH3:ABT-737). All current blockades were categorized by three current levels (L1, L2, and L3). **b.** Statistical histograms of open probability of L1 to L3 current levels. The Bcl-xL/Bak-BH3 complex was titrated with ABT-737 at the molar ratios of 1:2:1, 1:2:5, and 1:2:10 to monitor the protein-protein interaction (PPI) inhibition by ABT-737. **c.** Scatter plots ( $\Delta I/I_0$  vs. dwell time) of multi-level current blockades. All current traces were filtered using a Bessel (8-pole) 1 kHz filter. **d.** The Bcl-xL/Bak-BH3 (1:2) complex was titrated with ABT-737 at the molar ratios of 1:2:1, 1:2:5, and 1:2:10. Open probability of the Bcl-xL/ABT-737 (1:0:2) complex without Bak-BH3 was included for comparison. Data are presented as mean  $\pm$  SD,  $n = 4$  independent replicates for Bcl-xL;  $n = 3$  independent replicates for the Bcl-xL/Bak-BH3 complex;  $n = 3$  for Bcl-xL/Bak-BH3 complex in the presence of ABT-737. Source data are provided as a Source Data file. All electrical recordings were conducted in 1 M KCl at pH 7.5, with a 100 kHz sampling rate and a 10 kHz Bessel filter.

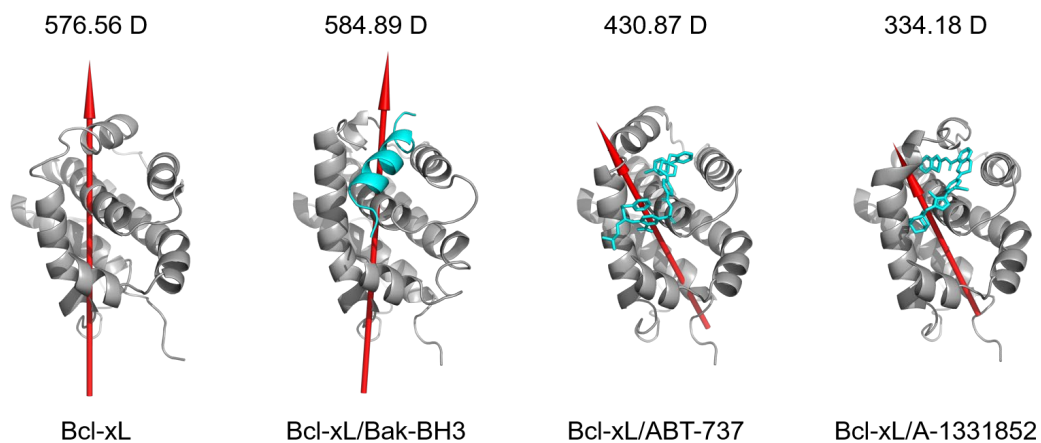

**Supplementary Fig. 13: Orientation and strength of dipole moment for free Bcl-xL and three Bcl-xL complexes (Bcl-xL/Bak-BH3, Bcl-xL/ABT-737, and Bcl-xL/A-1331852).** The dipole moments (Debye, D) were calculated by using a Discovery Studio software. The red arrows indicate the direction of the protein dipole. Bcl-xL and binders are shown in gray and cyan, respectively.

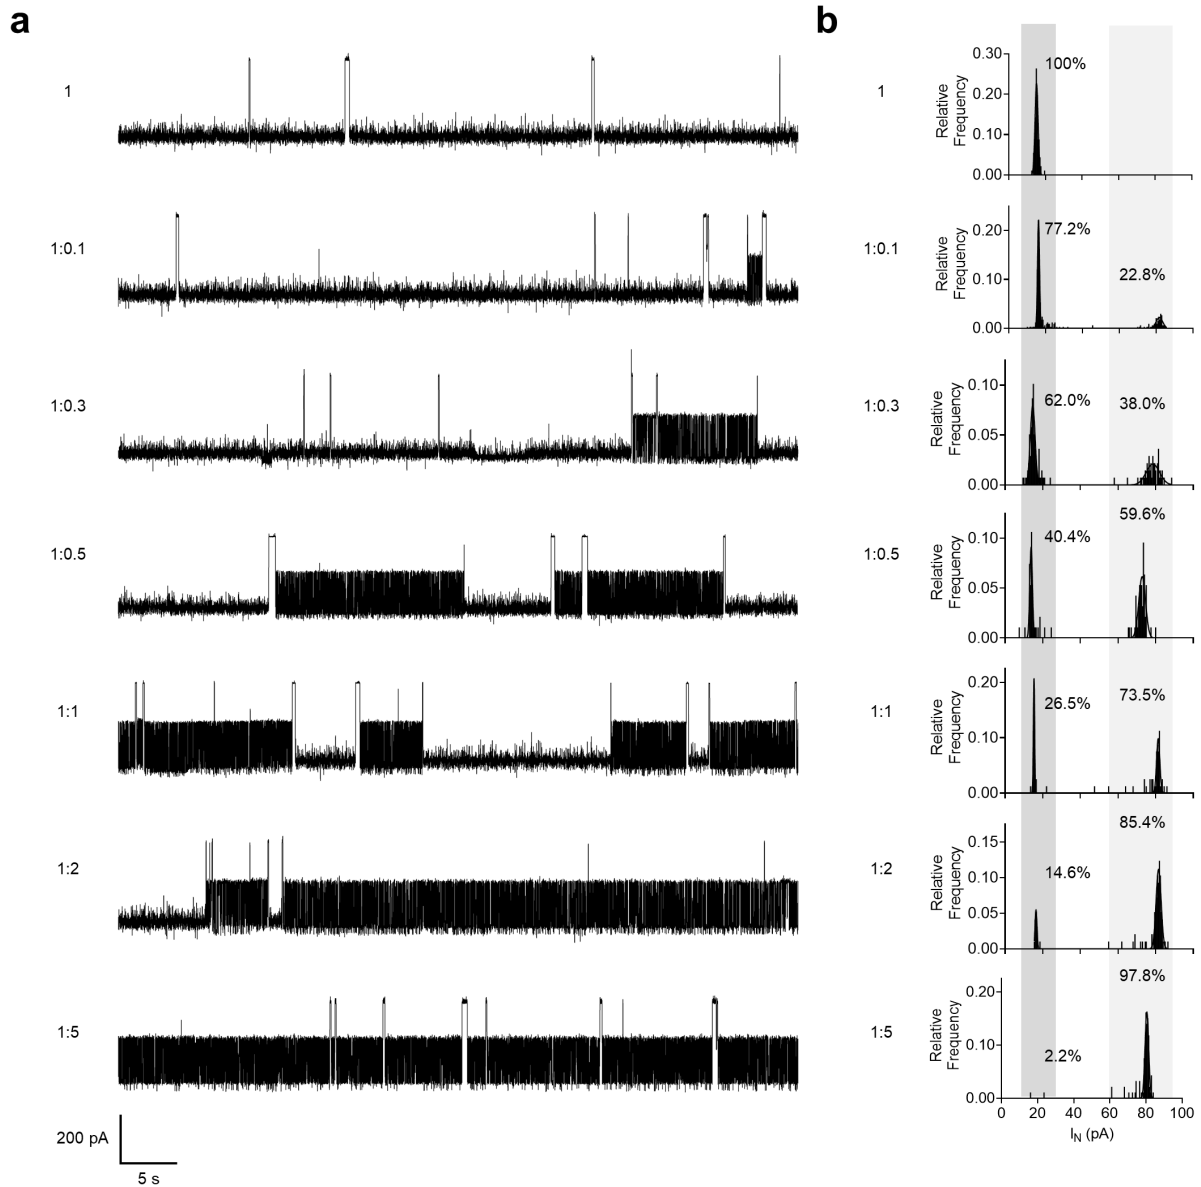

**Supplementary Fig. 14: Current noise ( $I_N$ )-based analysis of nanopore events upon titration of Bcl-xL with Bak-BH3. a.** Representative current traces obtained from titration of Bak-BH3 into Bcl-xL at the molar ratios of 1:0.1, 1:0.3, 1:0.5, 1:1, 1:2, and 1:5. **b.** Statistical histograms of  $I_N$  values for each titration point.

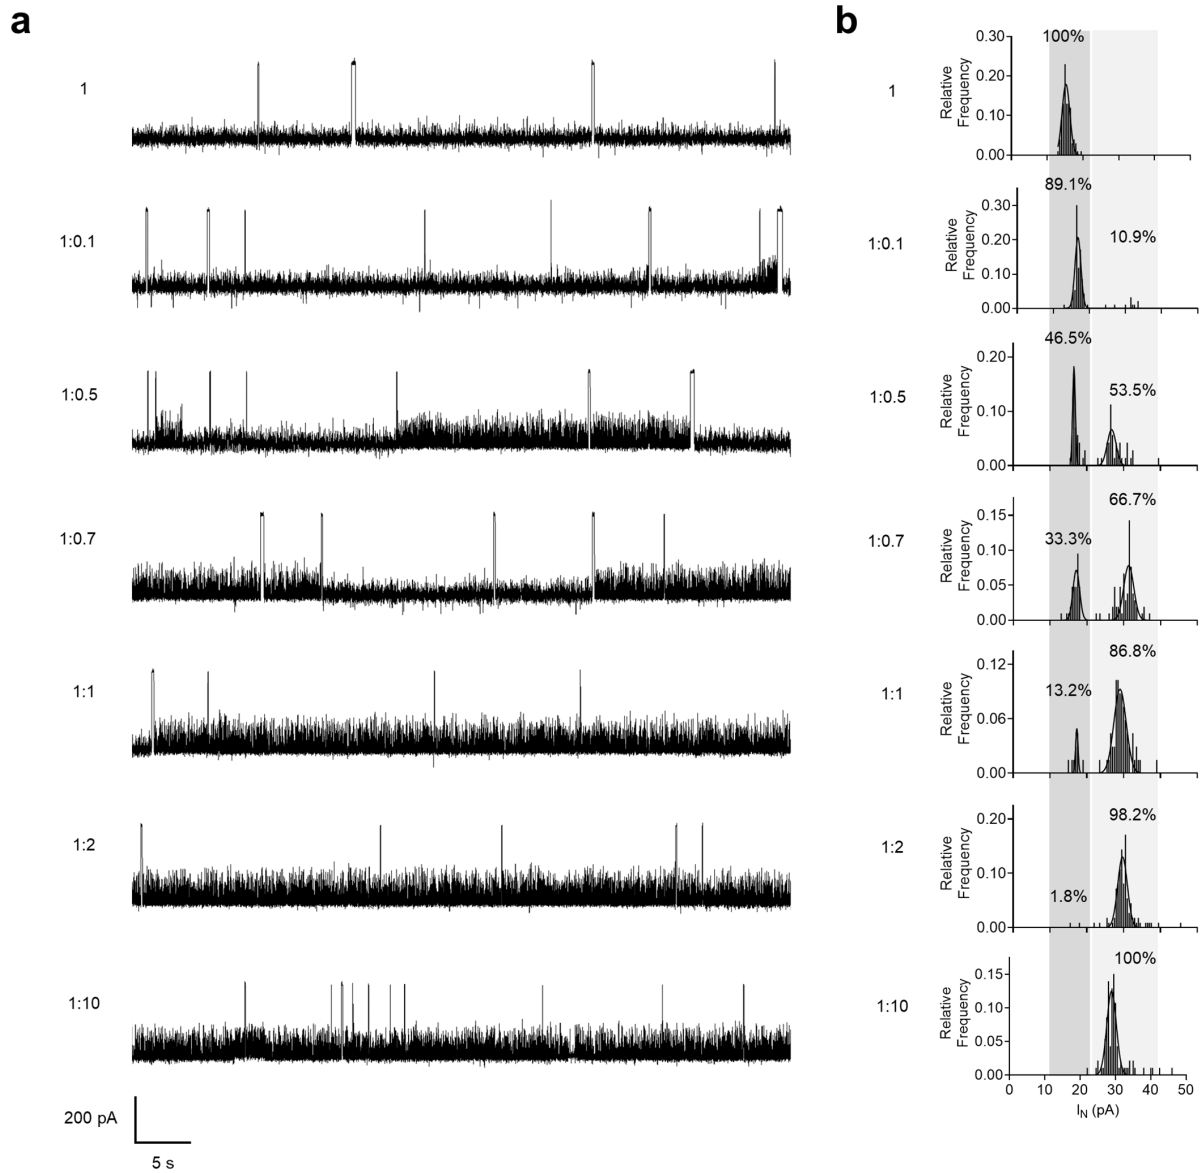

**Supplementary Fig. 15: Current noise ( $I_N$ )-based analysis of nanopore events upon titration of Bcl-xL with ABT-737. a.** Representative current traces obtained from titration of ABT-737 into Bcl-xL at the molar ratios of 1:0.1, 1:0.5, 1:0.7, 1:1, 1:2, and 1:10. **b.** Statistical histograms of  $I_N$  values for each titration point.

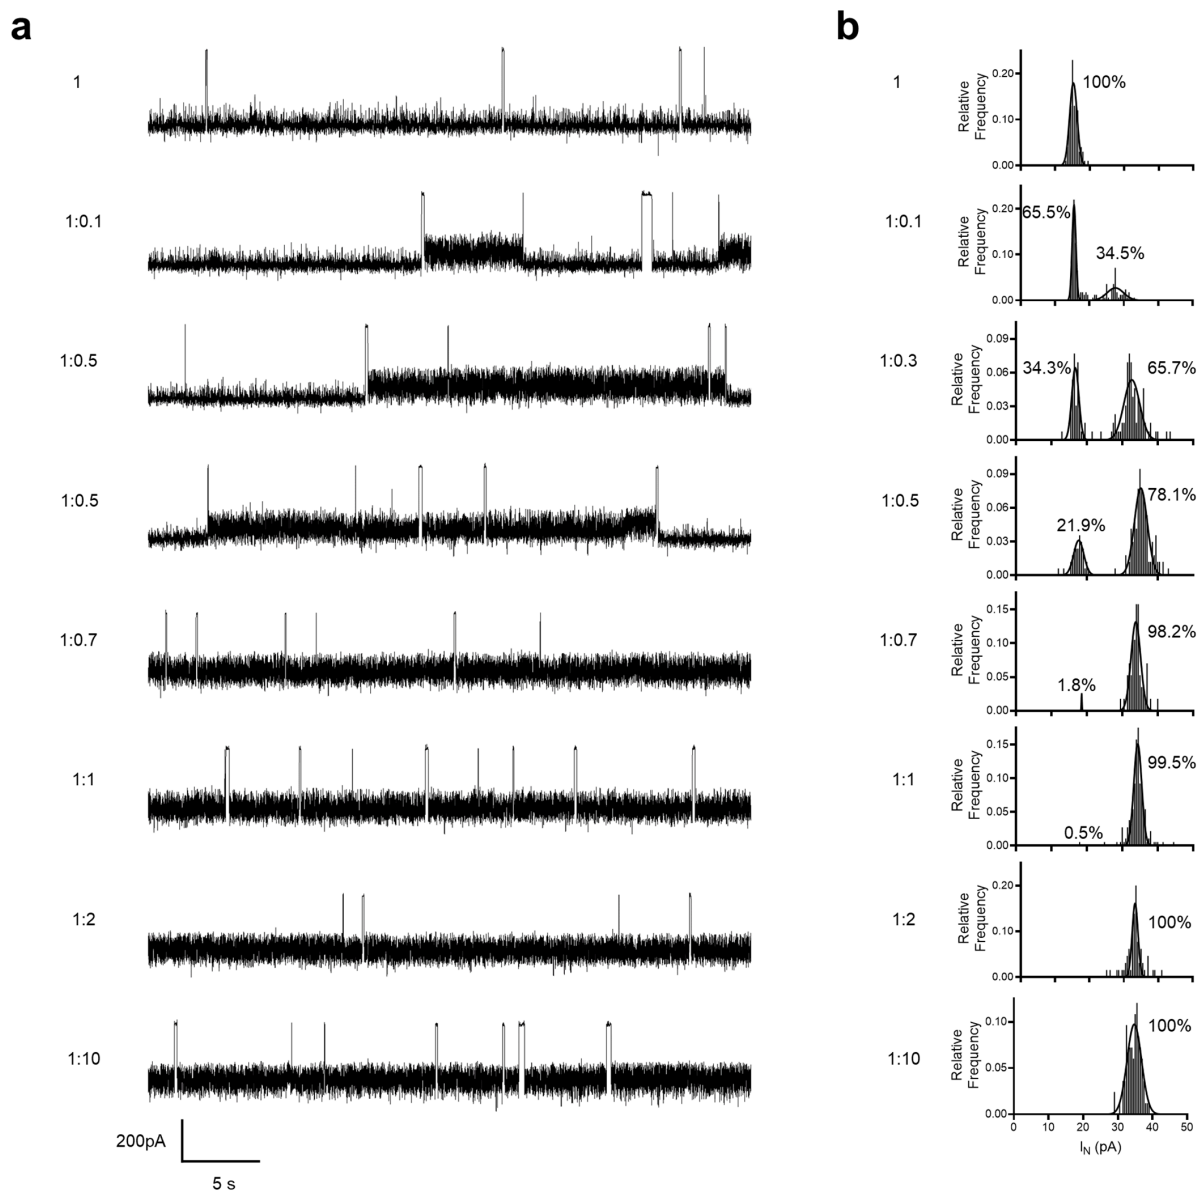

**Supplementary Fig. 16: Current noise ( $I_N$ )-based analysis of nanopore events upon titration of Bcl-xL with A-1331852. a. Representative current traces obtained from titration of A-1331852 into Bcl-xL at the molar ratios of 1:0.1, 1:0.3, 1:0.5, 1:0.7, 1:1, 1:2, and 1:10. b. Statistical histograms of  $I_N$  values for each titration point.**

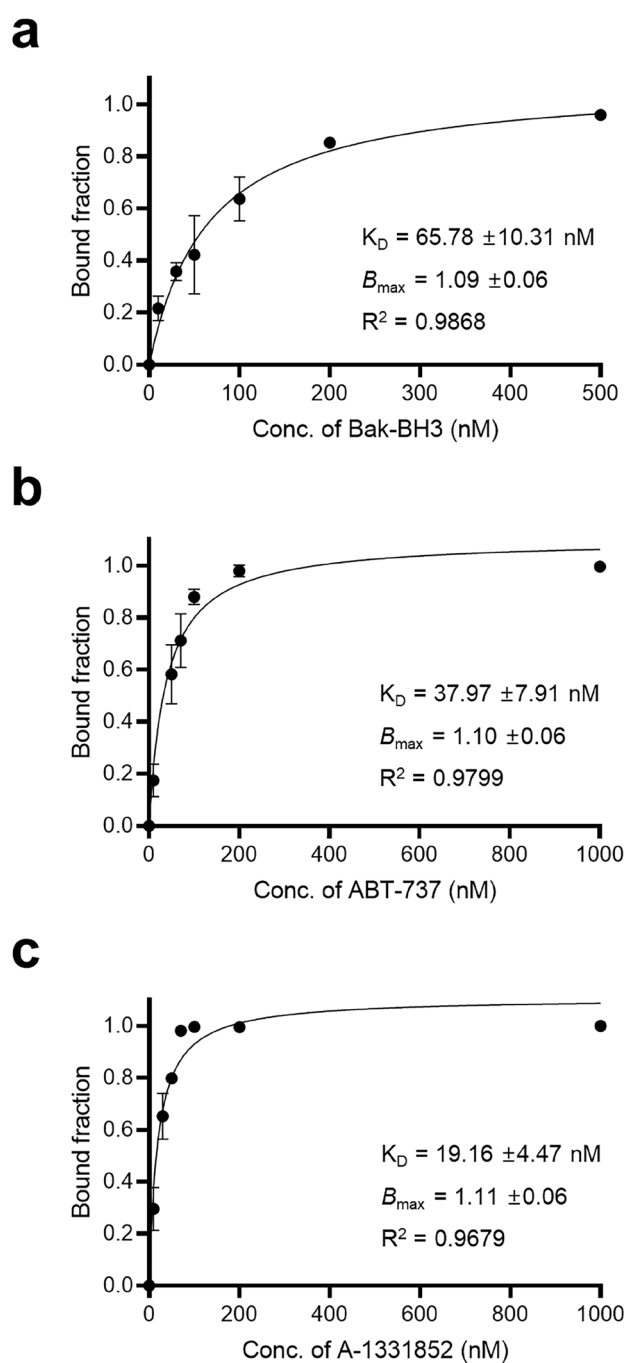

**Supplementary Fig. 17: Current noise ( $I_N$ ) analysis-based determination of Bcl-xL binding affinity for Bak-BH3 peptide, ABT-737, and A-1331852 using YaxAB nanopores. a-c. Hill diagrams (bound fraction vs. the concentration of ligand) of the Bcl-xL/Bak-BH3 complex (a), the Bcl-xL/ABT-737 complex (b), and the Bcl-xL/A-1331852 complex (c). Data are presented as mean  $\pm$  SEM,  $n = 3$  independent replicates. Source data are provided as a Source Data file. All measurements were performed by applying 100 mV to the *cis* chamber in 1 M KCl, 10 mM Tris-HCl (pH 7.5), and 1 mM EDTA, with sampling rate of 100 kHz using a 100 Hz Bessel filter. All analytes including Bcl-xL were added to the *cis* chamber.**



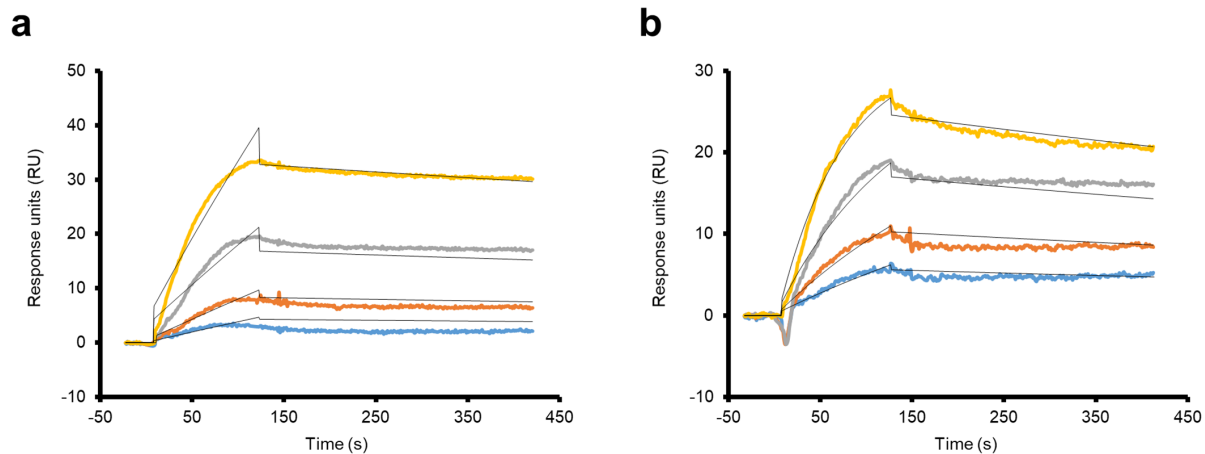

**Supplementary Fig. 18. SPR analysis for interaction between Bcl-xL and small-molecule drugs.** SPR sensorgrams are shown for binding of Bcl-xL with ABT-737 (a) and A-1331852 (b). The concentrations of small-molecule drugs used are 300 (yellow), 150 (gray), 75 (orange), and 37.5 nM (blue).

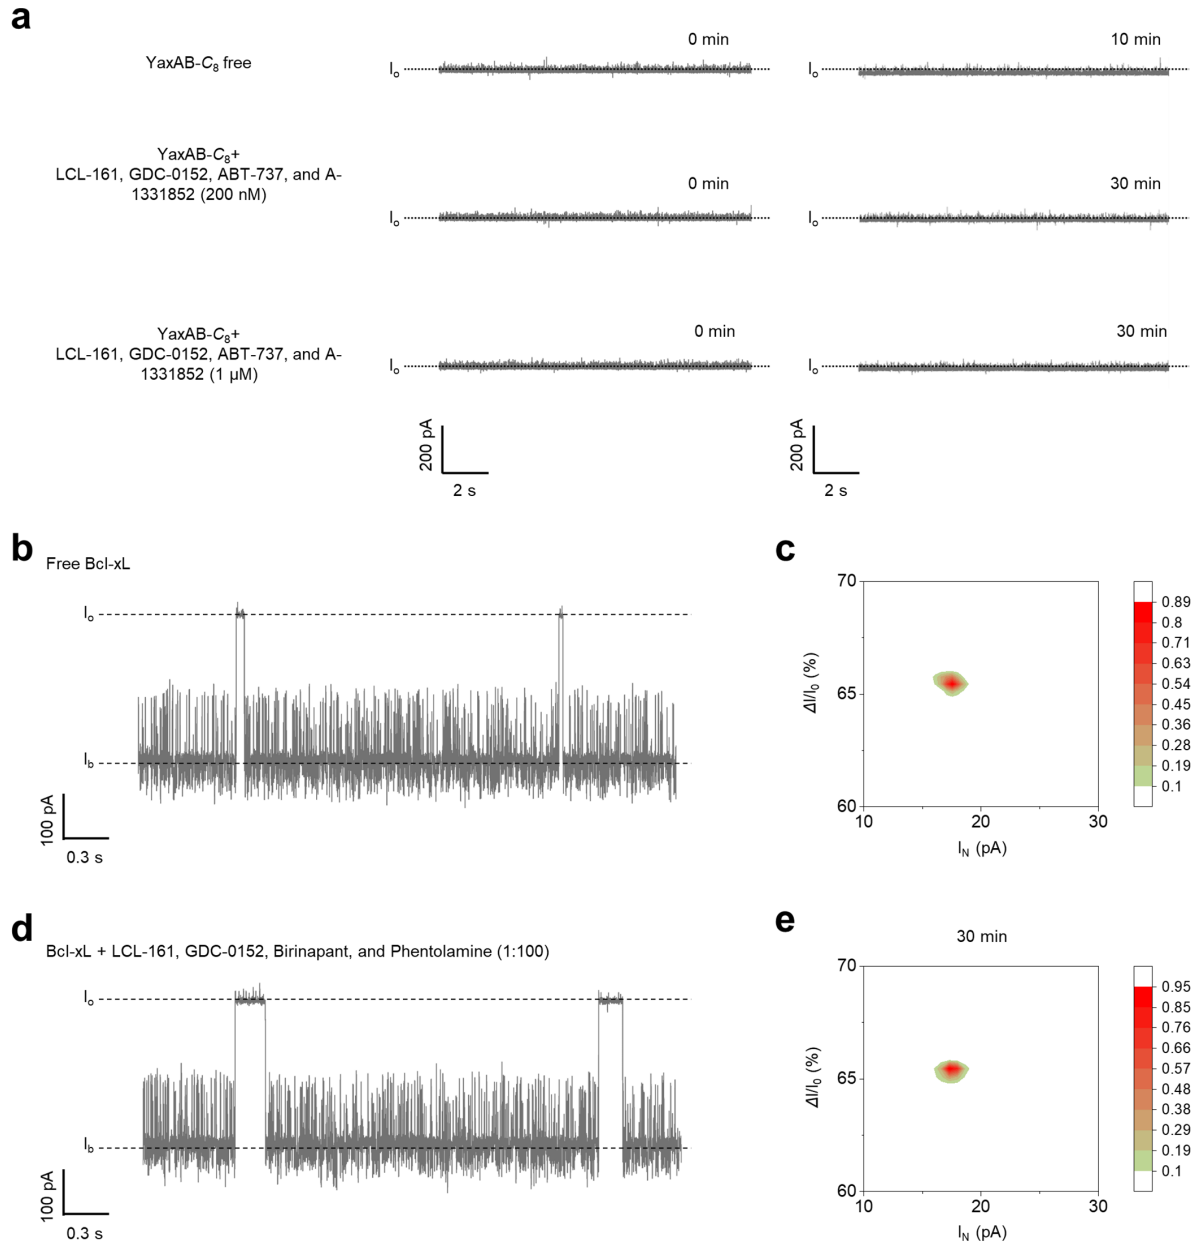

**Supplementary Fig. 19. YaxAB nanopore measurements with non-specific small-molecule ligands. a.** Representative current traces of free YaxAB- $C_8$  and YaxAB- $C_8$  with small-molecule non-binders (LCL-161, GDC-0152, ABT-737, and A-1331852) at 200 nM and 1  $\mu$ M. **b-e.** Representative multi-level current blockades (**b, d**) and 2D  $\Delta I/I_0$ -versus- $I_N$  density contour plot of free Bcl-xL and Bcl-xL with small-molecule non-binders (LCL-161, GDC-0152, Birinapant, and Phentolamine) at a molar ratio of 1:100 (**c, e**).

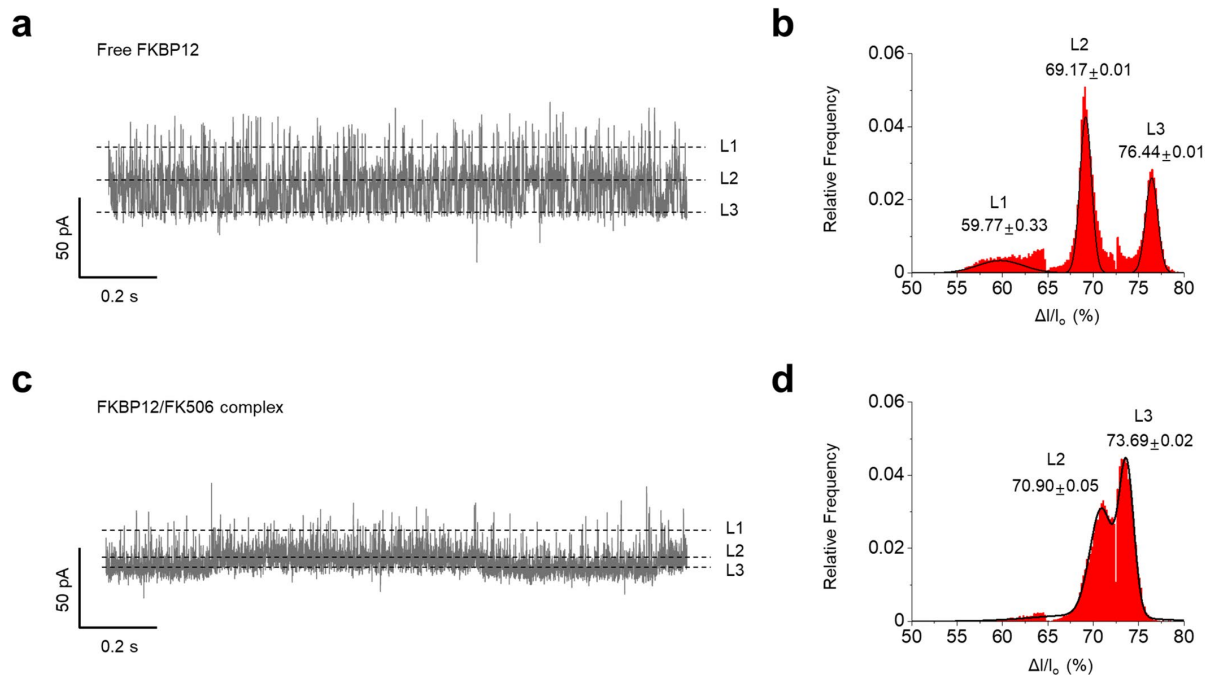

**Supplementary Fig. 20: Detection of FKBP12/FK506 interaction using YaxAB nanopores.**  
**a-b.** Multi-level current blockades (**a**), and histogram of  $\Delta I/I_0$  of free FKBP12 (**b**). **c-d.** Multi-level current blockades (**c**), and histogram of  $\Delta I/I_0$  of FKBP12/FK506 complex (**d**).

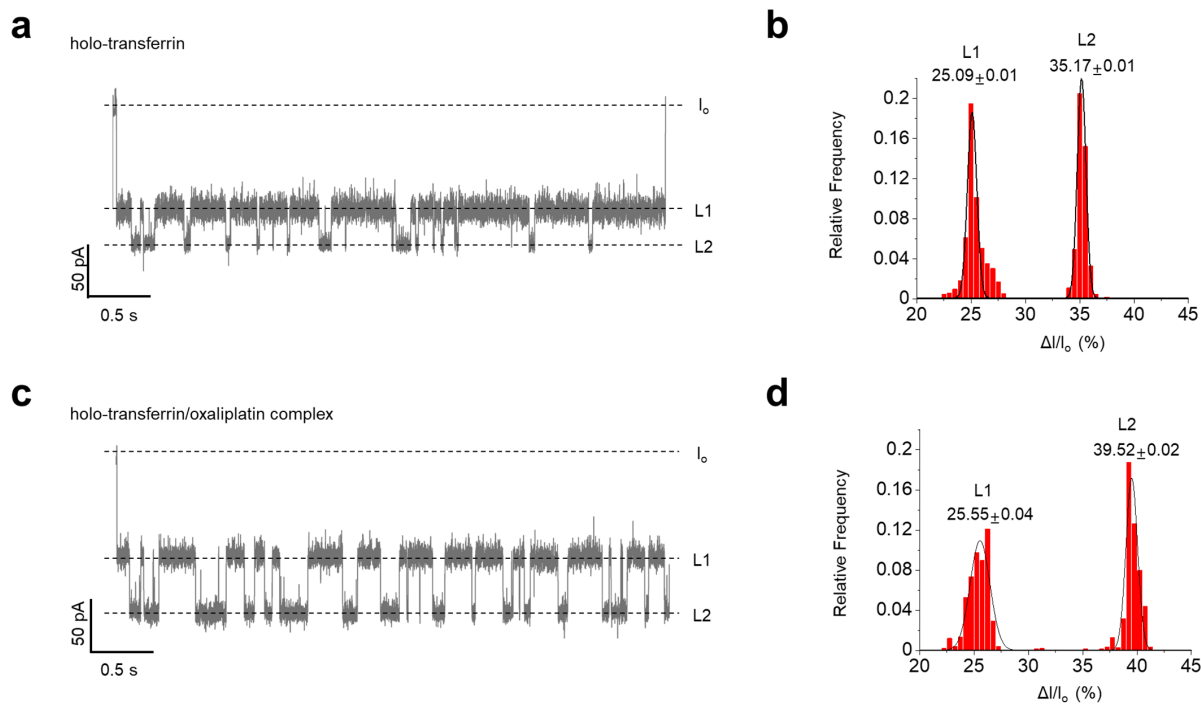

**Supplementary Fig. 21: Detection of holo-transferrin/oxaliplatin interaction using YaxAB nanopores.** **a-b.** Representative current traces showing multi-level current blockades (L1 and L2) (**a**), and histogram of  $\Delta I/I_0$  of free holo-transferrin (**b**). **c-d.** Representative current traces showing multi-level current blockades (L1–L2) (**c**), and histogram of  $\Delta I/I_0$  of the holo-transferrin/oxaliplatin complex (**d**).

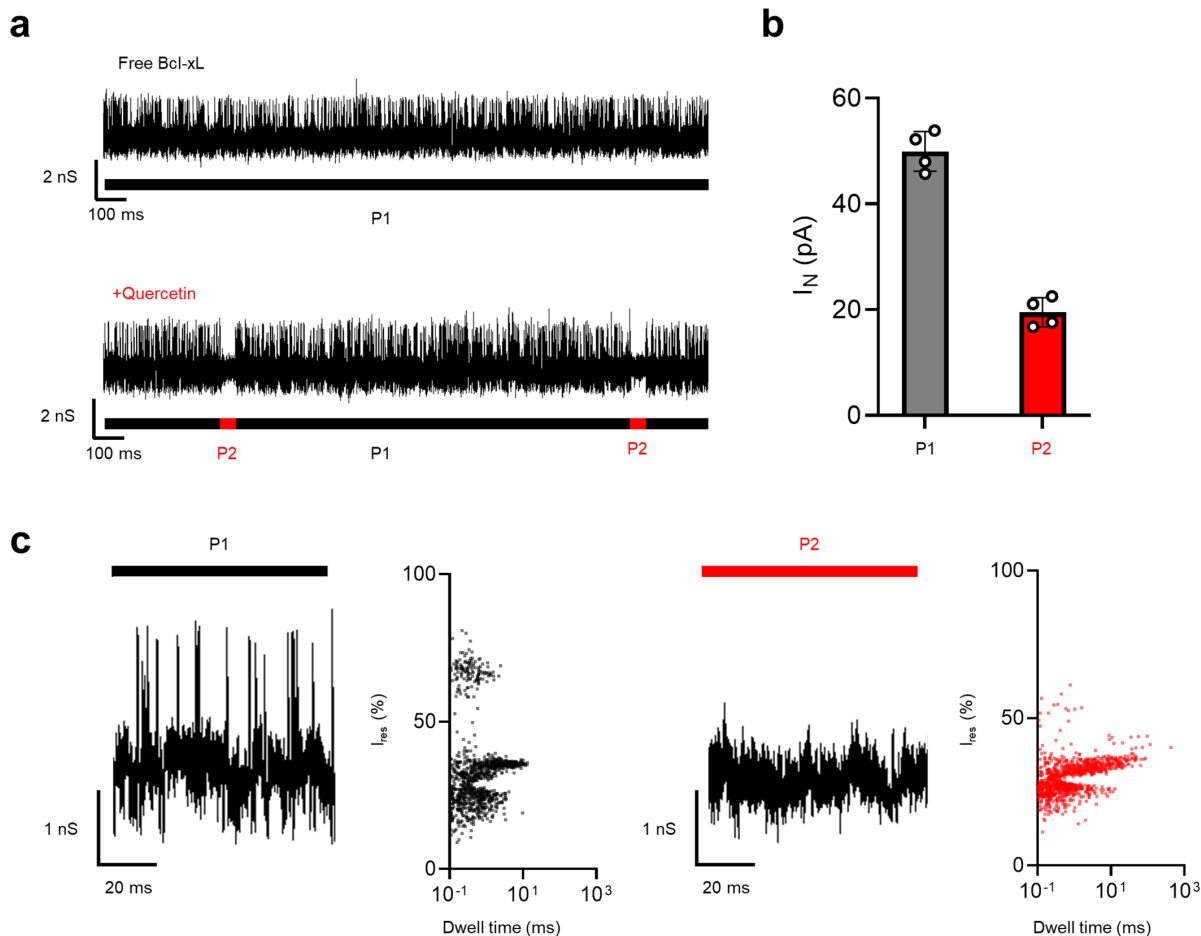

**Supplementary Fig. 22: Current blockade and noise analyses of Bcl-xL/Quercetin interactions using YaxAB nanopores.** **a.** Representative current traces for free Bcl-xL and the addition of Quercetin. Current signal pattern P1 (black) is temporally transformed to P2 in the presence of Quercetin (red). **b.** Current noise ( $I_N$ ) values of P1 and P2. Data are presented as mean  $\pm$  SD,  $n=4$  independent replicates for Bcl-xL in the presence of Quercetin. The mean value of  $I_N$ : P1,  $49.17 \pm 4.21$  pA; P2,  $18.95 \pm 3.12$  pA. Source data are provided as a Source Data file. **c.** Representative zoom-in current traces and corresponding scatter plot ( $I_{res}$  vs. dwell time) of Bcl-xL (P1) and the addition of Quercetin (P2). All current traces were recorded at +100 mV in 1 M KCl, 10 mM Tris-HCl, 1 mM EDTA, pH 7.5, with 1  $\mu$ M Bcl-xL in the presence of Quercetin (at 1:20 molar ratio).

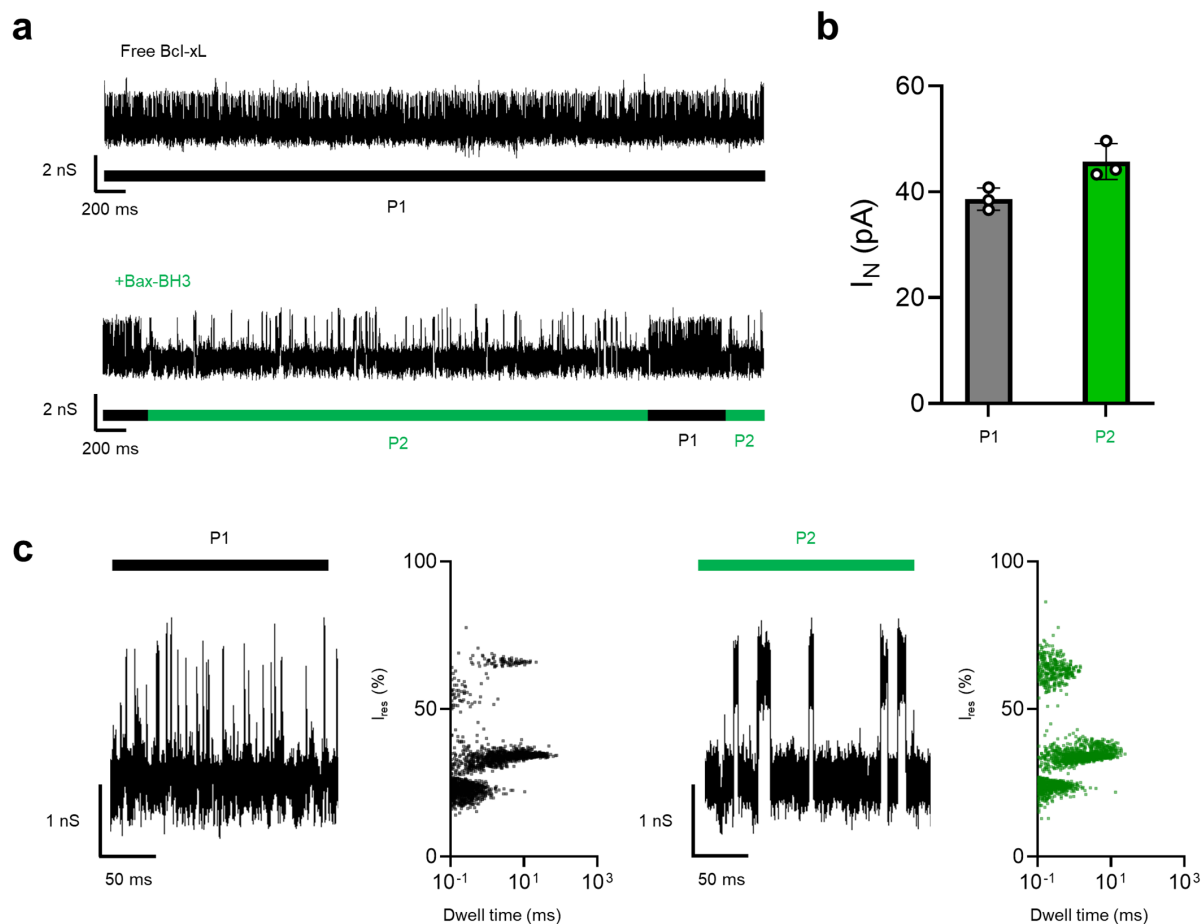

**Supplementary Fig. 23: Current blockade and noise analyses of Bcl-xL/Bax-BH3 interactions using YaxAB nanopores.** **a.** Representative current traces for free Bcl-xL and the addition of Bax-BH3 peptide. Current signal pattern P1 (black) is temporally transformed to P2 in the presence of Bax-BH3 peptide (green). **b.** Current noise ( $I_N$ ) values of P1 and P2. Data are presented as mean  $\pm$  SD,  $n = 3$  independent replicates for Bcl-xL in the presence of Bax-BH3 peptide. The mean value of  $I_N$ : P1,  $38.62 \pm 2.09$  pA; P2,  $45.72 \pm 3.39$  pA. Source data are provided as a Source Data file. **c.** Representative current traces and corresponding scatter plot ( $I_{res}$  vs. dwell time) of Bcl-xL (P1) and the addition of Bax-BH3 peptide (P2). All current traces were recorded at +100 mV in 1 M KCl, 10 mM Tris-HCl, 1 mM EDTA, pH 7.5, with 1  $\mu$ M Bcl-xL in the presence of Bax-BH3 peptide (at 1:100 molar ratio).

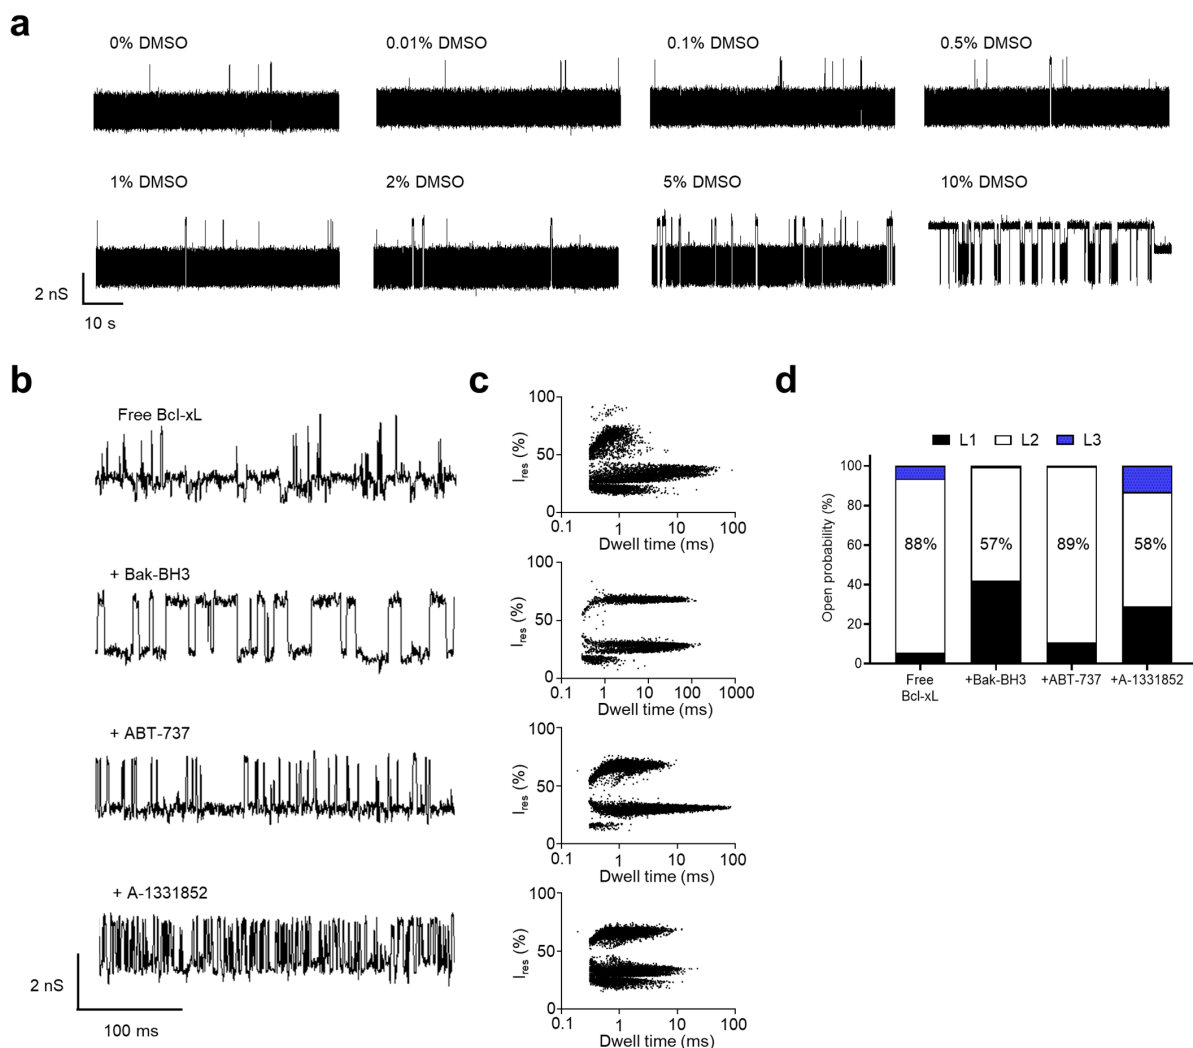

**Supplementary Fig. 24: YaxAB nanopore measurements in the presence of DMSO. a.** Representative current traces of Bcl-xL in the presence of DMSO at various concentrations (0 to 10 %). **b-c.** Representative multi-level current blockades (**b**) and scatter plots ( $I_{res}$  vs. dwell time) of Bcl-xL and three complexes, Bcl-xL/Bak-BH3, Bcl-xL/ABT-737, and Bcl-xL/A-1331852 complexes (**c**). **d.** Stacked columns for open probability of L1-L3 levels measured from current blockades of free Bcl-xL and its complexes.

**Supplementary Table 1. Current-voltage (I-V) curves for YaxAB nanopores in symmetric salt conditions at pH 7.5\***

| Voltage (mV) | YaxAB-C <sub>10</sub> , 1 M KCl |      | YaxAB-C <sub>9</sub> , 1 M KCl |      | YaxAB-C <sub>8</sub> , 1 M KCl |      |
|--------------|---------------------------------|------|--------------------------------|------|--------------------------------|------|
|              | Current (pA)                    | S.D. | Current (pA)                   | S.D. | Current (pA)                   | S.D. |
| -100         | -1165.8                         | 23.8 | -898.7                         | 21.7 | -639.1                         | 9.0  |
| -80          | -928.0                          | 28.3 | -707.6                         | 11.8 | -501.8                         | 5.3  |
| -60          | -687.7                          | 18.1 | -526.0                         | 8.6  | -369.3                         | 3.8  |
| -40          | -453.6                          | 16.3 | -347.2                         | 5.5  | -241.4                         | 1.2  |
| -20          | -223.4                          | 11.2 | -172.1                         | 2.9  | -117.9                         | 0.7  |
| 0            | 0.0                             | 0.0  | 0.0                            | 0.0  | 0.0                            | 0.0  |
| 20           | 227.2                           | 4.0  | 167.2                          | 3.2  | 113.2                          | 1.0  |
| 40           | 450.6                           | 7.4  | 328.5                          | 5.7  | 220.9                          | 2.9  |
| 60           | 668.9                           | 10.7 | 484.9                          | 9.4  | 321.4                          | 3.5  |
| 80           | 881.0                           | 14.2 | 633.5                          | 11.9 | 416.6                          | 5.5  |
| 100          | 1086.5                          | 16.9 | 776.0                          | 17.2 | 506.1                          | 6.4  |

\* The buffer contained 1 M KCl, 10 mM Tris-HCl (pH 7.5), and 1 mM EDTA. Each current data represents the average value. Standard deviations are based on data in triplicate. Source data are provided as a Source Data file.



**Supplementary Table 2. Current-voltage (I-V) curves for YaxAB nanopores in asymmetric salt conditions at pH 7.5\***

| Voltage (mV) | YaxAB-C <sub>10</sub> , 2 M KCl in <i>trans</i> |      | YaxAB-C <sub>9</sub> , 2 M KCl in <i>trans</i> |      | YaxAB-C <sub>8</sub> , 2 M KCl in <i>trans</i> |      |
|--------------|-------------------------------------------------|------|------------------------------------------------|------|------------------------------------------------|------|
|              | Current (pA)                                    | S.D. | Current (pA)                                   | S.D. | Current (pA)                                   | S.D. |
| -50          | -646.9                                          | 44.9 | -487.3                                         | 13.4 | -349.3                                         | 34.8 |
| -40          | -522.8                                          | 34.7 | -395.6                                         | 7.7  | -282.5                                         | 28.4 |
| -30          | -402.3                                          | 22.8 | -306.8                                         | 3.7  | -221.8                                         | 21.1 |
| -20          | -282.9                                          | 14.0 | -218.9                                         | 2.8  | -161.2                                         | 15.7 |
| -10          | -170.5                                          | 11.5 | -133.2                                         | 2.9  | -105.4                                         | 9.0  |
| 0            | -53.2                                           | 9.4  | -49.7                                          | 3.8  | -51.0                                          | 4.0  |
| 10           | 61.4                                            | 9.2  | 31.0                                           | 4.9  | 1.7                                            | 2.3  |
| 20           | 172.9                                           | 11.0 | 108.8                                          | 6.5  | 51.2                                           | 6.6  |
| 30           | 280.5                                           | 13.6 | 184.2                                          | 8.2  | 99.0                                           | 10.2 |
| 40           | 388.9                                           | 11.8 | 255.8                                          | 9.8  | 144.4                                          | 15.1 |
| 50           | 488.3                                           | 18.1 | 326.1                                          | 11.0 | 187.4                                          | 18.8 |

\* The buffer contained either 2 M or 0.5 M KCl in 10 mM Tris-HCl (pH 7.5) and 1 mM EDTA. Each current data represents the average value. Standard deviations are based on data in triplicate. Source data are provided as a Source Data file.

**Supplementary Table 3. Ion selectivity of YaxAB nanopores**

| Pore type               | YaxAB-C <sub>10</sub> | YaxAB-C <sub>9</sub> | YaxAB-C <sub>8</sub> |
|-------------------------|-----------------------|----------------------|----------------------|
| Reversal potential (mV) | 5.48 ± 0.14           | 7.65 ± 0.70          | 11.69 ± 0.14         |
| $P_{K^+}/P_{Cl^-}$      | 1.47 ± 0.01           | 1.72 ± 0.09          | 2.34 ± 0.03          |

Data are presented as mean ± SD, n = 3 independent replicates. Source data are provided as a Source Data file.

**Supplementary Table 4. Molecular properties of Bcl-xL and its complexes**

| Molecule         | M.W. (Da) | Excluded volume (Å <sup>3</sup> ) | Dipole moment (D) |
|------------------|-----------|-----------------------------------|-------------------|
| Bcl-xL           | 20,781.0  | 24,301                            | 576.56            |
| Bcl-xL/Bak-BH3*  | 22,505.9  | 26,306                            | 584.89            |
| Bcl-xL/ABT-737   | 21,594.4  | 24,021                            | 430.87            |
| Bcl-xL/A-1331852 | 21,439.8  | 23,756                            | 334.18            |

\* PDB code: 1BXL
